# Supplementary material for: Evaluation of the Molecular Landscape in PD-L1 Positive Metastatic NSCLC: Data from Campania, Italy
Source: MDPI journal article supplement (doi:10.3390/ijms23158541), 2022-08-01
Supplement: s1 [file s1]

**Table S1** Patients and samples characteristics with PD-L1 and molecular data.

| Patient | Sex | Age | Sample type  | Sample subtype | Site      | Diagnosis       | PD-L1 | clone |
|---------|-----|-----|--------------|----------------|-----------|-----------------|-------|-------|
| 1       | M   | 64  | Cytological  | Cell block     | Lung      | NSCLC-NOS       | 1-50% | 22C3  |
| 2       | M   | 63  | Histological | Biopsy         | Lung      | NSCLC favor ADC | >50%  | 22C3  |
| 3       | M   | 68  | Histological | Biopsy         | Liver     | ADC             | 1-50% | 22C3  |
| 4       | M   | 52  | Histological | Resection      | Brain     | ADC             | 1-50% | 22C3  |
| 5       | F   | 61  | Histological | Resection      | Lung      | NSCLC favor ADC | >50%  | 22C3  |
| 6       | F   | 83  | Histological | Biopsy         | Lung      | NSCLC favor ADC | 1-50% | 22C3  |
| 7       | F   | 65  | Cytological  | Cell block     | Lung      | NSCLC favor ADC | 1-50% | 22C3  |
| 8       | M   | 78  | Histological | Biopsy         | Lymphnode | NSCLC-NOS       | >50%  | 22C3  |
| 9       | F   | 81  | Histological | Biopsy         | Lung      | NSCLC-NOS       | 1-50% | 22C3  |
| 10      | M   | 49  | Histological | Biopsy         | Lung      | NSCLC favor ADC | 1-50% | 22C3  |
| 11      | M   | 61  | Cytological  | Cell block     | Lung      | ADC             | 1-50% | 22C3  |
| 12      | F   | 76  | Histological | Biopsy         | Lung      | SqCC            | 1-50% | 22C3  |
| 13      | F   | 63  | Histological | Resection      | Lung      | ADC             | >50%  | 22C3  |
| 14      | M   | 72  | Cytological  | Cell block     | Lung      | NSCLC favor ADC | 1-50% | 22C3  |
| 15      | M   | 73  | Cytological  | Cell block     | Lymphnode | NSCLC favor ADC | >50%  | 22C3  |
| 16      | F   | 78  | Histological | Resection      | Bone      | SqCC            | >50%  | 22C3  |
| 17      | M   | 76  | Histological | Biopsy         | Lung      | ADC             | 1-50% | 22C3  |
| 18      | M   | 52  | Histological | Biopsy         | Lung      | ADC             | 1-50% | 22C3  |
| 19      | F   | 58  | Cytological  | Cell block     | Lung      | NSCLC-NOS       | >50%  | 22C3  |
| 20      | F   | 68  | Histological | Biopsy         | Lymphnode | NSCLC-NOS       | >50%  | 22C3  |
| 21      | M   | 70  | Cytological  | Cell block     | Lymphnode | NSCLC favor ADC | >50%  | 22C3  |
| 22      | F   | 78  | Histological | Resection      | Colon     | NSCLC-NOS       | 1-50% | 22C3  |
| 23      | M   | 72  | Cytological  | Cell block     | Lymphnode | NSCLC favor ADC | 1-50% | 22C3  |

|    |   |    |              |            |           |                 |       |       |
|----|---|----|--------------|------------|-----------|-----------------|-------|-------|
| 24 | M | 62 | Cytological  | Cell block | Lymphnode | NSCLC favor ADC | >50%  | 22C3  |
| 25 | F | 60 | Histological | Biopsy     | Brain     | NSCLC favor ADC | >50%  | 22C3  |
| 26 | M | 43 | Histological | Resection  | Brain     | NSCLC favor ADC | 1-50% | 22C3  |
| 27 | F | 70 | Cytological  | Cell block | Lung      | ADC             | >50%  | 22C3  |
| 28 | M | 75 | Histological | Biopsy     | Lung      | NSCLC favor ADC | >50%  | 22C3  |
| 29 | F | 76 | Histological | Biopsy     | Lung      | NSCLC favor ADC | >50%  | 22C3  |
| 30 | F | 56 | Histological | Biopsy     | Lung      | NSCLC favor ADC | 1-50% | 22C3  |
| 31 | F | 70 | Cytological  | Cell block | Lung      | ADC             | >50%  | 22C3  |
| 32 | M | 67 | Histological | Biopsy     | Pleura    | NSCLC favor ADC | 1-50% | 22C3  |
| 33 | M | 59 | Histological | Resection  | Brain     | NSCLC-NOS       | 1-50% | SP263 |
| 34 | M | 62 | Histological | Resection  | Lymphnode | ADC             | >50%  | 22C3  |
| 35 | F | 58 | Cytological  | Cell block | Lymphnode | ADC             | >50%  | SP263 |
| 36 | M | 44 | Cytological  | Cell block | Lung      | NSCLC-NOS       | 1-50% | SP263 |
| 37 | M | 60 | Histological | Biopsy     | Lung      | NSCLC-NOS       | 1-50% | SP263 |
| 38 | F | 62 | Histological | Biopsy     | Bone      | ADC             | 1-50% | SP263 |
| 39 | M | 50 | Histological | Biopsy     | Lung      | NSCLC favor ADC | 1-50% | SP263 |
| 40 | M | 68 | Histological | Biopsy     | Lung      | NSCLC-NOS       | >50%  | SP263 |
| 41 | M | 64 | Histological | Biopsy     | Lung      | NSCLC favor ADC | 1-50% | SP263 |
| 42 | F | 50 | Histological | Resection  | Lung      | ADC             | 1-50% | SP263 |
| 43 | M | 70 | Histological | Biopsy     | Brain     | NSCLC favor ADC | >50%  | SP263 |
| 44 | M | 53 | Cytological  | Cell block | Lung      | NSCLC favor ADC | 1-50% | SP263 |
| 45 | M | 62 | Cytological  | Cell block | Lymphnode | NSCLC favor ADC | >50%  | SP263 |

|    |   |    |              |            |           |                  |       |       |
|----|---|----|--------------|------------|-----------|------------------|-------|-------|
| 46 | F | 68 | Histological | Resection  | Lymphnode | ADC              | 1-50% | SP263 |
| 47 | M | 65 | Histological | Biopsy     | Lung      | ADC              | >50%  | SP263 |
| 48 | M | 78 | Cytological  | Smear      | Lung      | ADC              | >50%  | SP263 |
| 49 | M | 71 | Histological | Biopsy     | Lung      | NSCLC favor ADC  | 1-50% | SP263 |
| 50 | M | 79 | Histological | Biopsy     | Lung      | SqCC             | 1-50% | SP263 |
| 51 | M | 72 | Cytological  | Cell block | Lung      | NSCLC favor ADC  | 1-50% | SP263 |
| 52 | M | 46 | Histological | Biopsy     | Brain     | NSCLC favor ADC  | 1-50% | SP263 |
| 53 | F | 60 | Histological | Biopsy     | Lung      | ADC              | >50%  | SP263 |
| 54 | F | 73 | Histological | Biopsy     | Lung      | NSCLC favor ADC  | >50%  | SP263 |
| 55 | F | 49 | Cytological  | Cell block | Lymphnode | NSCLC favor ADC  | >50%  | SP263 |
| 56 | M | 85 | Histological | Biopsy     | Lung      | NSCLC favor ADC  | >50%  | SP263 |
| 57 | F | 79 | Histological | Biopsy     | Brain     | NSCLC-NOS        | 1-50% | SP263 |
| 58 | M | 48 | Histological | Biopsy     | Pleura    | NSCLC favor ADC  | 1-50% | SP263 |
| 59 | F | 60 | Histological | Biopsy     | Lung      | NSCLC favor ADC  | >50%  | SP263 |
| 60 | M | 68 | Cytological  | Cell block | Lung      | SqCC             | 1-50% | SP263 |
| 61 | M | 65 | Cytological  | Cell block | Bone      | ADC              | 1-50% | SP263 |
| 62 | M | 73 | Histological | Biopsy     | Lung      | NSCLC favor SqCC | >50%  | SP263 |
| 63 | F | 66 | Histological | Biopsy     | Lung      | SqCC             | 1-50% | SP263 |
| 64 | M | 73 | Cytological  | Cell block | Lung      | NSCLC favor SqCC | >50%  | SP263 |
| 65 | M | 77 | Histological | Biopsy     | Lung      | NSCLC favor ADC  | >50%  | SP263 |
| 66 | M | 77 | Cytological  | Cell block | Lung      | NSCLC-NOS        | >50%  | SP263 |
| 67 | F | 62 | Histological | Resection  | Lymphnode | NSCLC favor ADC  | >50%  | SP263 |

|    |   |    |              |            |             |                 |       |       |
|----|---|----|--------------|------------|-------------|-----------------|-------|-------|
| 68 | M | 65 | Histological | Resection  | Lymphnode   | ADC             | 1-50% | SP263 |
| 69 | M | 65 | Histological | Biopsy     | Lymphnode   | NSCLC-NOS       | >50%  | SP263 |
| 70 | M | 68 | Histological | Biopsy     | Lung        | NSCLC favor ADC | >50%  | SP263 |
| 71 | M | 79 | Histological | Biopsy     | Lung        | ADC             | 1-50% | SP263 |
| 72 | M | 44 | Histological | Biopsy     | Lung        | NSCLC-NOS       | >50%  | SP263 |
| 73 | M | 80 | Cytological  | Cell block | Lymphnode   | NSCLC-NOS       | >50%  | SP263 |
| 74 | F | 66 | Histological | Biopsy     | Lung        | NSCLC favor ADC | >50%  | SP263 |
| 75 | M | 75 | Cytological  | Smear      | Lung        | ADC             | 1-50% | SP263 |
| 76 | M | 80 | Histological | Resection  | Brain       | ADC             | 1-50% | SP263 |
| 77 | M | 49 | Cytological  | Cell block | Lung        | NSCLC favor ADC | >50%  | SP263 |
| 78 | M | 63 | Cytological  | Cell block | Lung        | NSCLC favor ADC | >50%  | SP263 |
| 79 | F | 67 | Cytological  | Cell block | Lymphnode   | NSCLC favor ADC | 1-50% | SP263 |
| 80 | F | 45 | Histological | Resection  | Lung        | ADC             | 1-50% | SP263 |
| 81 | F | 61 | Histological | Biopsy     | Soft tissue | NSCLC favor ADC | >50%  | SP263 |
| 82 | M | 72 | Histological | Biopsy     | Brain       | ADC             | 1-50% | SP263 |
| 83 | F | 69 | Cytological  | Cell block | Lung        | ADC             | 1-50% | SP263 |
| 84 | M | 68 | Histological | Biopsy     | Lymphnode   | NSCLC-NOS       | >50%  | SP263 |
| 85 | M | 81 | Histological | Biopsy     | Lung        | NSCLC favor ADC | 1-50% | SP263 |
| 86 | M | 84 | Cytological  | Cell block | Lymphnode   | ADC             | 1-50% | SP263 |
| 87 | F | 69 | Cytological  | Cell block | Soft tissue | ADC             | 1-50% | SP263 |
| 88 | M | 59 | Histological | Biopsy     | Lung        | NSCLC favor ADC | >50%  | SP263 |
| 89 | F | 76 | Cytological  | Cell block | Lung        | ADC             | 1-50% | SP263 |
| 90 | M | 65 | Cytological  | Cell block | Lung        | ADC             | 1-50% | SP263 |
| 91 | M | 56 | Histological | Biopsy     | Lung        | NSCLC-NOS       | >50%  | SP263 |

|     |   |    |              |            |               |                  |       |       |
|-----|---|----|--------------|------------|---------------|------------------|-------|-------|
| 92  | M | 57 | Histological | Biopsy     | Lung          | NSCLC-NOS        | >50%  | SP263 |
| 93  | M | 70 | Cytological  | Cell block | Lymphnode     | NSCLC favor ADC  | 1-50% | SP263 |
| 94  | M | 78 | Histological | Biopsy     | Lung          | NSCLC favor ADC  | >50%  | SP263 |
| 95  | F | 50 | Histological | Biopsy     | Lung          | NSCLC favor SqCC | >50%  | SP263 |
| 96  | M | 74 | Cytological  | Cell block | Pleura        | ADC              | >50%  | SP263 |
| 97  | F | 66 | Histological | Resection  | Brain         | ADC              | >50%  | SP263 |
| 98  | M | 72 | Cytological  | Cell block | Lung          | NSCLC favor ADC  | 1-50% | SP263 |
| 99  | M | 61 | Histological | Biopsy     | Pleura        | NSCLC favor ADC  | >50%  | SP263 |
| 100 | M | 74 | Histological | Biopsy     | Lymphnode     | ADC              | >50%  | SP263 |
| 101 | M | 77 | Histological | Biopsy     | Lymphnode     | NSCLC favor ADC  | 1-50% | SP263 |
| 102 | M | 75 | Histological | Biopsy     | Lymphnode     | ADC              | >50%  | SP263 |
| 103 | M | 78 | Histological | Biopsy     | Lymphnode     | NSCLC favor ADC  | >50%  | SP263 |
| 104 | F | 63 | Histological | Resection  | Lung          | ADC              | 1-50% | SP263 |
| 105 | F | 75 | Histological | Biopsy     | Lung          | ADC              | 1-50% | SP263 |
| 106 | M | 57 | Histological | Biopsy     | Lung          | ADC-SqCC         | >50%  | SP263 |
| 107 | F | 59 | Cytological  | Cell block | Adrenal gland | ADC              | 1-50% | SP263 |
| 108 | M | 77 | Histological | Resection  | Lung          | ADC              | >50%  | SP263 |
| 109 | M | 64 | Histological | Biopsy     | Bone          | ADC              | >50%  | SP263 |
| 110 | F | 76 | Histological | Biopsy     | Bone          | NSCLC-NOS        | >50%  | SP263 |
| 111 | M | 73 | Histological | Resection  | Lung          | ADC              | 1-50% | SP263 |
| 112 | M | 53 | Histological | Biopsy     | Lung          | ADC-SqCC         | 1-50% | SP263 |
| 113 | M | 80 | Cytological  | Cell block | Lung          | ADC              | >50%  | SP263 |
| 114 | M | 59 | Cytological  | Cell block | Lung          | NSCLC favor ADC  | >50%  | SP263 |
| 115 | F | 74 | Cytological  | Cell block | Lung          | ADC              | 1-50% | SP263 |

|     |   |    |                  |            |                  |                        |       |       |
|-----|---|----|------------------|------------|------------------|------------------------|-------|-------|
| 116 | M | 53 | Cytological      | Smear      | Lung             | ADC                    | 1-50% | SP263 |
| 117 | M | 57 | Histologica<br>l | Resection  | Lung             | NSCLC-<br>NOS          | >50%  | SP263 |
| 118 | M | 80 | Cytological      | Cell block | Lung             | NSCLC<br>favor ADC     | 1-50% | SP263 |
| 119 | F | 69 | Histologica<br>l | Biopsy     | Lung             | NSCLC<br>favor ADC     | 1-50% | SP263 |
| 120 | F | 64 | Histologica<br>l | Biopsy     | Lung             | ADC                    | 1-50% | SP263 |
| 121 | M | 76 | Histologica<br>l | Biopsy     | Lung             | ADC-<br>SqCC           | >50%  | SP263 |
| 122 | F | 73 | Histologica<br>l | Biopsy     | Lung             | NSCLC<br>favor ADC     | >50%  | SP263 |
| 123 | M | 47 | Histologica<br>l | Biopsy     | Brain            | NSCLC-<br>NOS          | 1-50% | SP263 |
| 124 | M | 74 | Cytological      | Cell block | Lung             | ADC                    | 1-50% | SP263 |
| 125 | M | 52 | Histologica<br>l | Biopsy     | Skin             | ADC                    | 1-50% | SP263 |
| 126 | F | 62 | Cytological      | Cell block | Lung             | ADC                    | 1-50% | SP263 |
| 127 | M | 63 | Cytological      | Cell block | Lung             | NSCLC<br>favor ADC     | >50%  | SP263 |
| 128 | M | 72 | Cytological      | Cell block | Lung             | ADC                    | 1-50% | SP263 |
| 129 | M | 78 | Cytological      | Cell block | Lung             | SqCC                   | 1-50% | SP263 |
| 130 | M | 70 | Histologica<br>l | Biopsy     | Lung             | NSCLC<br>favor ADC     | >50%  | SP263 |
| 131 | M | 73 | Cytological      | Cell block | Lung             | ADC                    | 1-50% | SP263 |
| 132 | M | 75 | Cytological      | Cell block | Lung             | NSCLC<br>favor ADC     | 1-50% | SP263 |
| 133 | M | 93 | Cytological      | Cell block | Pleura           | ADC                    | >50%  | SP263 |
| 134 | M | 62 | Cytological      | Smear      | Pleura           | ADC                    | >50%  | SP263 |
| 135 | F | 76 | Cytological      | Smear      | Lung             | NSCLC-<br>NOS          | >50%  | SP263 |
| 136 | F | 55 | Cytological      | Cell block | Lung             | NSCLC-<br>NOS          | >50%  | SP263 |
| 137 | F | 71 | Histologica<br>l | Biopsy     | Lung             | ADC                    | 1-50% | SP263 |
| 138 | M | 74 | Histologica<br>l | Biopsy     | Adrenal<br>gland | NSCLC-<br>NOS          | >50%  | SP263 |
| 139 | M | 77 | Cytological      | Cell block | Lung             | NSCLC<br>favor<br>SqCC | 1-50% | SP263 |
| 140 | M | 75 | Histologica<br>l | Biopsy     | Liver            | ADC                    | 1-50% | SP263 |

|     |   |    |                  |            |                  |                    |       |       |
|-----|---|----|------------------|------------|------------------|--------------------|-------|-------|
| 141 | M | 68 | Histologica<br>l | Biopsy     | Lung             | ADC                | >50%  | SP263 |
| 142 | F | 69 | Histologica<br>l | Biopsy     | Lung             | NSCLC<br>favor ADC | >50%  | SP263 |
| 143 | F | 92 | Histologica<br>l | Biopsy     | Pleura           | ADC                | 1-50% | SP263 |
| 144 | F | 67 | Cytological      | Cell block | Lymphnod<br>e    | ADC                | 1-50% | SP263 |
| 145 | F | 71 | Cytological      | Cell block | Lymphnod<br>e    | NSCLC<br>favor ADC | >50%  | SP263 |
| 146 | F | 80 | Cytological      | Cell block | Lung             | NSCLC<br>favor ADC | >50%  | SP263 |
| 147 | F | 62 | Histologica<br>l | Biopsy     | Brain            | NSCLC-<br>NOS      | 1-50% | SP263 |
| 148 | F | 54 | Histologica<br>l | Resection  | Lung             | ADC                | 1-50% | SP263 |
| 149 | M | 64 | Histologica<br>l | Biopsy     | Lung             | NSCLC<br>favor ADC | 1-50% | SP263 |
| 150 | F | 72 | Cytological      | Cell block | Lung             | NSCLC<br>favor ADC | >50%  | SP263 |
| 151 | F | 69 | Histologica<br>l | Biopsy     | Lung             | ADC                | 1-50% | SP263 |
| 152 | M | 72 | Histologica<br>l | Biopsy     | Lung             | SqCC               | 1-50% | SP263 |
| 153 | F | 59 | Histologica<br>l | Resection  | Lung             | NSCLC-<br>NOS      | >50%  | SP263 |
| 154 | F | 85 | Histologica<br>l | Biopsy     | Lung             | NSCLC-<br>NOS      | 1-50% | SP263 |
| 155 | F | 74 | Histologica<br>l | Resection  | Brain            | ADC                | >50%  | SP263 |
| 156 | M | 76 | Histologica<br>l | Biopsy     | Lung             | NSCLC-<br>NOS      | 1-50% | SP263 |
| 157 | F | 75 | Histologica<br>l | Resection  | Lung             | ADC                | >50%  | SP263 |
| 158 | M | 78 | Histologica<br>l | Biopsy     | Lung             | SqCC               | >50%  | SP263 |
| 159 | M | 77 | Histologica<br>l | Biopsy     | Bone             | NSCLC-<br>NOS      | >50%  | SP263 |
| 160 | F | 58 | Histologica<br>l | Resection  | Brain            | ADC                | 1-50% | SP263 |
| 161 | M | 61 | Histologica<br>l | Biopsy     | Adrenal<br>gland | NSCLC-<br>NOS      | >50%  | SP263 |
| 162 | M | 61 | Histologica<br>l | Biopsy     | Lung             | NSCLC-<br>NOS      | >50%  | SP263 |
| 163 | M | 62 | Histologica<br>l | Biopsy     | Pleura           | ADC                | 1-50% | SP263 |
| 164 | M | 77 | Histologica<br>l | Biopsy     | Liver            | ADC                | 1-50% | SP263 |
| 165 | F | 75 | Histologica<br>l | Biopsy     | Soft tissue      | NSCLC-<br>NOS      | >50%  | SP263 |
| 166 | F | 72 | Histologica<br>l | Biopsy     | Liver            | ADC                | >50%  | SP263 |

|     |   |    |                  |        |      |                    |      |       |
|-----|---|----|------------------|--------|------|--------------------|------|-------|
| 167 | F | 53 | Histologica<br>1 | Biopsy | Lung | NSCLC<br>favor ADC | >50% | SP263 |
|-----|---|----|------------------|--------|------|--------------------|------|-------|



| Platform      | Molecular platform | EGFR    | KRAS   | NRAS | BRAF    | KIT | PDGFRA | PIK3CA  |
|---------------|--------------------|---------|--------|------|---------|-----|--------|---------|
| Ventana-Roche | NGS                | WT      | WT     | WT   | WT      | WT  | WT     | WT      |
| Ventana-Roche | NGS                | WT      | p.G12C | WT   | WT      | WT  | WT     | WT      |
| Ventana-Roche | NGS                | WT      | WT     | WT   | WT      | WT  | WT     | WT      |
| Ventana-Roche | NGS                | WT      | p.G12V | WT   | WT      | WT  | WT     | WT      |
| Ventana-Roche | NGS                | WT      | p.G12C | WT   | WT      | WT  | WT     | WT      |
| Ventana-Roche | NGS                | WT      | WT     | WT   | WT      | WT  | WT     | WT      |
| Ventana-Roche | NGS                | WT      | WT     | WT   | WT      | WT  | WT     | WT      |
| Ventana-Roche | NGS                | WT      | WT     | WT   | WT      | WT  | WT     | WT      |
| Ventana-Roche | NGS                | WT      | p.G12R | WT   | WT      | WT  | WT     | WT      |
| Ventana-Roche | NGS                | WT      | WT     | WT   | WT      | WT  | WT     | WT      |
| Ventana-Roche | NGS                | WT      | WT     | WT   | WT      | WT  | WT     | WT      |
| Ventana-Roche | NGS                | WT      | WT     | WT   | WT      | WT  | WT     | WT      |
| Ventana-Roche | NGS                | WT      | p.G12C | WT   | WT      | WT  | WT     | WT      |
| Ventana-Roche | NGS                | WT      | WT     | WT   | WT      | WT  | WT     | WT      |
| Ventana-Roche | NGS                | WT      | WT     | WT   | WT      | WT  | WT     | WT      |
| Ventana-Roche | RT-qPCR            | p.S768I | WT     | ---  | WT      | --- | ---    | ---     |
| Ventana-Roche | NGS                | WT      | WT     | WT   | WT      | WT  | WT     | p.E542K |
| Ventana-Roche | NGS                | p.L858R | WT     | WT   | WT      | WT  | WT     | WT      |
| Ventana-Roche | NGS                | WT      | WT     | WT   | WT      | WT  | WT     | WT      |
| Ventana-Roche | NGS                | WT      | WT     | WT   | p.V600E | WT  | WT     | WT      |
| Ventana-Roche | NGS                | WT      | WT     | WT   | WT      | WT  | WT     | WT      |
| Ventana-Roche | NGS                | WT      | WT     | WT   | WT      | WT  | WT     | WT      |

|               |     |                |        |        |    |    |    |    |
|---------------|-----|----------------|--------|--------|----|----|----|----|
| Ventana-Roche | NGS | WT             | WT     | WT     | WT | WT | WT | WT |
| Ventana-Roche | NGS | WT             | p.G12A | WT     | WT | WT | WT | WT |
| Ventana-Roche | NGS | WT             | WT     | WT     | WT | WT | WT | WT |
| Ventana-Roche | NGS | WT             | WT     | WT     | WT | WT | WT | WT |
| Ventana-Roche | NGS | WT             | WT     | WT     | WT | WT | WT | WT |
| Ventana-Roche | NGS | WT             | p.G12C | WT     | WT | WT | WT | WT |
| Ventana-Roche | NGS | WT             | p.G13C | WT     | WT | WT | WT | WT |
| Ventana-Roche | NGS | WT             | p.Q61H | WT     | WT | WT | WT | WT |
| Ventana-Roche | NGS | p.E746_A750del | WT     | WT     | WT | WT | WT | WT |
| Ventana-Roche | NGS | WT             | WT     | WT     | WT | WT | WT | WT |
| Ventana-Roche | NGS | WT             | WT     | WT     | WT | WT | WT | WT |
| Ventana-Roche | NGS | WT             | WT     | WT     | WT | WT | WT | WT |
| Ventana-Roche | NGS | WT             | WT     | p.G12D | WT | WT | WT | WT |
| Ventana-Roche | NGS | WT             | WT     | WT     | WT | WT | WT | WT |
| Ventana-Roche | NGS | WT             | p.G12C | WT     | WT | WT | WT | WT |
| Ventana-Roche | NGS | WT             | WT     | WT     | WT | WT | WT | WT |
| Ventana-Roche | NGS | WT             | WT     | WT     | WT | WT | WT | WT |
| Ventana-Roche | NGS | WT             | WT     | WT     | WT | WT | WT | WT |
| Ventana-Roche | NGS | WT             | p.G12C | WT     | WT | WT | WT | WT |
| Ventana-Roche | NGS | WT             | p.G13C | WT     | WT | WT | WT | WT |
| Ventana-Roche | NGS | WT             | WT     | WT     | WT | WT | WT | WT |

[illegible]

|               |     |                 |        |    |    |    |    |    |
|---------------|-----|-----------------|--------|----|----|----|----|----|
| Ventana-Roche | NGS | WT              | p.G12A | WT | WT | WT | WT | WT |
| Ventana-Roche | NGS | WT              | WT     | WT | WT | WT | WT | WT |
| Ventana-Roche | NGS | WT              | WT     | WT | WT | WT | WT | WT |
| Ventana-Roche | NGS | WT              | WT     | WT | WT | WT | WT | WT |
| Ventana-Roche | NGS | p.LE746_S752del | WT     | WT | WT | WT | WT | WT |
| Ventana-Roche | NGS | WT              | WT     | WT | WT | WT | WT | WT |
| Ventana-Roche | NGS | WT              | p.G12V | WT | WT | WT | WT | WT |
| Ventana-Roche | NGS | WT              | p.G12C | WT | WT | WT | WT | WT |
| Ventana-Roche | NGS | WT              | p.G12C | WT | WT | WT | WT | WT |
| Ventana-Roche | NGS | WT              | WT     | WT | WT | WT | WT | WT |
| Ventana-Roche | NGS | p.L858R         | WT     | WT | WT | WT | WT | WT |
| Ventana-Roche | NGS | WT              | WT     | WT | WT | WT | WT | WT |
| Ventana-Roche | NGS | p.L858R         | WT     | WT | WT | WT | WT | WT |
| Ventana-Roche | NGS | WT              | p.G12V | WT | WT | WT | WT | WT |
| Ventana-Roche | NGS | WT              | p.Q61H | WT | WT | WT | WT | WT |
| Ventana-Roche | NGS | WT              | p.G12C | WT | WT | WT | WT | WT |
| Ventana-Roche | NGS | p.E746_A750del  | WT     | WT | WT | WT | WT | WT |
| Ventana-Roche | NGS | WT              | p.G12V | WT | WT | WT | WT | WT |
| Ventana-Roche | NGS | WT              | p.G12C | WT | WT | WT | WT | WT |
| Ventana-Roche | NGS | p.S768_D760dup  | WT     | WT | WT | WT | WT | WT |
| Ventana-Roche | NGS | WT              | p.Q61H | WT | WT | WT | WT | WT |
| Ventana-Roche | NGS | WT              | WT     | WT | WT | WT | WT | WT |
| Ventana-Roche | NGS | WT              | WT     | WT | WT | WT | WT | WT |
| Ventana-Roche | NGS | WT              | p.G12C | WT | WT | WT | WT | WT |

|               |     |                       |        |    |    |    |    |    |
|---------------|-----|-----------------------|--------|----|----|----|----|----|
| Ventana-Roche | NGS | WT                    | p.G12C | WT | WT | WT | WT | WT |
| Ventana-Roche | NGS | WT                    | p.G12V | WT | WT | WT | WT | WT |
| Ventana-Roche | NGS | WT                    | p.G12C | WT | WT | WT | WT | WT |
| Ventana-Roche | NGS | p.I744_K745insKIPV AI | WT     | WT | WT | WT | WT | WT |
| Ventana-Roche | NGS | WT                    | p.G12A | WT | WT | WT | WT | WT |
| Ventana-Roche | NGS | WT                    | WT     | WT | WT | WT | WT | WT |
| Ventana-Roche | NGS | WT                    | WT     | WT | WT | WT | WT | WT |
| Ventana-Roche | NGS | WT                    | p.G12C | WT | WT | WT | WT | WT |
| Ventana-Roche | NGS | WT                    | p.G12D | WT | WT | WT | WT | WT |
| Ventana-Roche | NGS | WT                    | p.G12V | WT | WT | WT | WT | WT |
| Ventana-Roche | NGS | WT                    | WT     | WT | WT | WT | WT | WT |
| Ventana-Roche | NGS | WT                    | WT     | WT | WT | WT | WT | WT |
| Ventana-Roche | NGS | WT                    | WT     | WT | WT | WT | WT | WT |
| Ventana-Roche | NGS | WT                    | p.G12C | WT | WT | WT | WT | WT |
| Ventana-Roche | NGS | WT                    | WT     | WT | WT | WT | WT | WT |
| Ventana-Roche | NGS | WT                    | WT     | WT | WT | WT | WT | WT |
| Ventana-Roche | NGS | WT                    | p.G12C | WT | WT | WT | WT | WT |
| Ventana-Roche | NGS | WT                    | WT     | WT | WT | WT | WT | WT |
| Ventana-Roche | NGS | WT                    | WT     | WT | WT | WT | WT | WT |
| Ventana-Roche | NGS | WT                    | p.G12C | WT | WT | WT | WT | WT |
| Ventana-Roche | NGS | WT                    | p.G12V | WT | WT | WT | WT | WT |
| Ventana-Roche | NGS | WT                    | WT     | WT | WT | WT | WT | WT |
| Ventana-Roche | NGS | WT                    | WT     | WT | WT | WT | WT | WT |
| Ventana-Roche | NGS | p.E746_A750del        | WT     | WT | WT | WT | WT | WT |
| Ventana-Roche | NGS | WT                    | p.G12C | WT | WT | WT | WT | WT |
| Ventana-Roche | NGS | WT                    | WT     | WT | WT | WT | WT | WT |
| Ventana-Roche | NGS | WT                    | p.G12C | WT | WT | WT | WT | WT |

|               |         |                |        |     |         |     |     |         |
|---------------|---------|----------------|--------|-----|---------|-----|-----|---------|
| Ventana-Roche | NGS     | WT             | p.G12C | WT  | WT      | WT  | WT  | WT      |
| Ventana-Roche | NGS     | WT             | WT     | WT  | WT      | WT  | WT  | p.E545K |
| Ventana-Roche | NGS     | WT             | WT     | WT  | WT      | WT  | WT  | WT      |
| Ventana-Roche | NGS     | WT             | WT     | WT  | p.G469A | WT  | WT  | WT      |
| Ventana-Roche | NGS     | WT             | WT     | WT  | WT      | WT  | WT  | WT      |
| Ventana-Roche | NGS     | WT             | WT     | WT  | WT      | WT  | WT  | WT      |
| Ventana-Roche | NGS     | p.L858R        | WT     | WT  | WT      | WT  | WT  | WT      |
| Ventana-Roche | NGS     | WT             | WT     | WT  | WT      | WT  | WT  | WT      |
| Ventana-Roche | NGS     | WT             | p.G12V | WT  | WT      | WT  | WT  | WT      |
| Ventana-Roche | NGS     | WT             | WT     | WT  | WT      | WT  | WT  | WT      |
| Ventana-Roche | NGS     | WT             | WT     | WT  | WT      | WT  | WT  | WT      |
| Ventana-Roche | NGS     | WT             | p.G12C | WT  | WT      | WT  | WT  | WT      |
| Ventana-Roche | NGS     | WT             | WT     | WT  | WT      | WT  | WT  | WT      |
| Ventana-Roche | NGS     | WT             | WT     | WT  | WT      | WT  | WT  | WT      |
| Ventana-Roche | NGS     | WT             | WT     | WT  | WT      | WT  | WT  | WT      |
| Ventana-Roche | NGS     | WT             | WT     | WT  | WT      | WT  | WT  | WT      |
| Ventana-Roche | NGS     | WT             | WT     | WT  | WT      | WT  | WT  | WT      |
| Ventana-Roche | NGS     | WT             | WT     | WT  | WT      | WT  | WT  | WT      |
| Ventana-Roche | NGS     | WT             | WT     | WT  | WT      | WT  | WT  | WT      |
| Ventana-Roche | RT-qPCR | WT             | WT     | --- | p.V600E | --- | --- | ---     |
| Ventana-Roche | NGS     | WT             | WT     | WT  | WT      | WT  | WT  | WT      |
| Ventana-Roche | NGS     | WT             | WT     | WT  | WT      | WT  | WT  | WT      |
| Ventana-Roche | NGS     | p.L858R        | WT     | WT  | WT      | WT  | WT  | WT      |
| Ventana-Roche | NGS     | WT             | p.G12V | WT  | WT      | WT  | WT  | WT      |
| Ventana-Roche | NGS     | WT             | WT     | WT  | WT      | WT  | WT  | WT      |
| Ventana-Roche | NGS     | p.E746_A750del | WT     | WT  | WT      | WT  | WT  | WT      |

|               |         |                 |        |     |    |     |     |         |
|---------------|---------|-----------------|--------|-----|----|-----|-----|---------|
| Ventana-Roche | NGS     | WT              | p.G12C | WT  | WT | WT  | WT  | WT      |
| Ventana-Roche | NGS     | WT              | WT     | WT  | WT | WT  | WT  | WT      |
| Ventana-Roche | NGS     | WT              | p.G12D | WT  | WT | WT  | WT  | WT      |
| Ventana-Roche | NGS     | WT              | p.G12V | WT  | WT | WT  | WT  | WT      |
| Ventana-Roche | NGS     | WT              | p.G12A | WT  | WT | WT  | WT  | WT      |
| Ventana-Roche | NGS     | p.L858R         | WT     | WT  | WT | WT  | WT  | WT      |
| Ventana-Roche | NGS     | p.E746_A750del  | WT     | WT  | WT | WT  | WT  | WT      |
| Ventana-Roche | NGS     | WT              | WT     | WT  | WT | WT  | WT  | WT      |
| Ventana-Roche | NGS     | WT              | p.G13R | WT  | WT | WT  | WT  | WT      |
| Ventana-Roche | NGS     | p.L858R         | WT     | WT  | WT | WT  | WT  | WT      |
| Ventana-Roche | NGS     | p.L858R         | WT     | WT  | WT | WT  | WT  | WT      |
| Ventana-Roche | NGS     | WT              | WT     | WT  | WT | WT  | WT  | WT      |
| Ventana-Roche | NGS     | WT              | WT     | WT  | WT | WT  | WT  | WT      |
| Ventana-Roche | NGS     | p.E709_T710insD | WT     | WT  | WT | WT  | WT  | WT      |
| Ventana-Roche | NGS     | p.E746_A750del  | WT     | WT  | WT | WT  | WT  | WT      |
| Ventana-Roche | NGS     | WT              | p.G12C | WT  | WT | WT  | WT  | WT      |
| Ventana-Roche | NGS     | WT              | WT     | WT  | WT | WT  | WT  | WT      |
| Ventana-Roche | NGS     | WT              | WT     | WT  | WT | WT  | WT  | WT      |
| Ventana-Roche | NGS     | WT              | p.G12C | WT  | WT | WT  | WT  | p.E545K |
| Ventana-Roche | NGS     | WT              | WT     | WT  | WT | WT  | WT  | WT      |
| Ventana-Roche | NGS     | WT              | WT     | WT  | WT | WT  | WT  | WT      |
| Ventana-Roche | NGS     | WT              | p.G12C | WT  | WT | WT  | WT  | WT      |
| Ventana-Roche | NGS     | WT              | WT     | WT  | WT | WT  | WT  | WT      |
| Ventana-Roche | NGS     | WT              | p.G12V | WT  | WT | WT  | WT  | WT      |
| Ventana-Roche | NGS     | WT              | p.G12C | WT  | WT | WT  | WT  | WT      |
| Ventana-Roche | RT-qPCR | WT              | p.G12A | --- | WT | --- | --- | ---     |

|                   |     |    |    |    |    |    |    |    |
|-------------------|-----|----|----|----|----|----|----|----|
| Ventana-<br>Roche | NGS | WT |
|-------------------|-----|----|----|----|----|----|----|----|



| ALK      | clone | ROS1     | clone |
|----------|-------|----------|-------|
| Negative | D5F3  | Negative | D4D6  |
| Negative | D5F3  | Negative | D4D6  |
| Negative | D5F3  | Negative | D4D6  |
| Negative | D5F3  | Negative | D4D6  |
| Negative | D5F3  | Negative | D4D6  |
| Negative | D5F3  | Negative | D4D6  |
| Negative | D5F3  | Negative | D4D6  |
| Negative | D5F3  | Negative | D4D6  |
| Negative | D5F3  | Negative | D4D6  |
| Negative | D5F3  | Negative | D4D6  |
| Negative | D5F3  | Negative | D4D6  |
| Negative | D5F3  | Negative | D4D6  |
| Negative | D5F3  | Negative | D4D6  |
| Negative | D5F3  | Negative | D4D6  |
| Negative | D5F3  | Negative | D4D6  |
| Negative | D5F3  | Negative | D4D6  |
| Negative | D5F3  | Negative | D4D6  |
| Negative | D5F3  | Negative | D4D6  |
| Negative | D5F3  | Negative | D4D6  |
| Negative | D5F3  | Negative | D4D6  |
| Negative | D5F3  | Negative | D4D6  |
| Negative | D5F3  | Negative | D4D6  |
| Negative | D5F3  | Negative | D4D6  |
| Negative | D5F3  | Negative | D4D6  |
| Negative | D5F3  | Negative | D4D6  |
| Positive | D5F3  | Negative | D4D6  |
| Negative | D5F3  | Negative | D4D6  |
| Negative | D5F3  | Negative | D4D6  |
| Negative | D5F3  | Negative | D4D6  |

[illegible]

[illegible]

[illegible]

[illegible]

|                  |      |          |      |
|------------------|------|----------|------|
| Negative         | D5F3 | Negative | D4D6 |
| Negative         | D5F3 | Negative | D4D6 |
| Negative         | D5F3 | Negative | D4D6 |
| Negative         | D5F3 | Negative | D4D6 |
| Negative         | D5F3 | Negative | D4D6 |
| Negative         | D5F3 | Negative | D4D6 |
| Negative         | D5F3 | Negative | D4D6 |
| Negative         | D5F3 | Negative | D4D6 |
| Positive         | D5F3 | Negative | D4D6 |
| Negative         | D5F3 | Negative | D4D6 |
| Negative         | D5F3 | Negative | D4D6 |
| Negative         | D5F3 | Negative | D4D6 |
| Negative         | D5F3 | Negative | D4D6 |
| Negative         | D5F3 | Negative | D4D6 |
| Negative         | D5F3 | Negative | D4D6 |
| Negative         | D5F3 | Negative | D4D6 |
| Negative         | D5F3 | Negative | D4D6 |
| Negative         | D5F3 | Negative | D4D6 |
| EML4(13)-ALK(20) | ---  | WT       | ---  |
| Negative         | D5F3 | Negative | D4D6 |
| Negative         | D5F3 | Negative | D4D6 |
| Negative         | D5F3 | Positive | D4D6 |
| Negative         | D5F3 | Negative | D4D6 |
| WT               | ---  | WT       | ---  |

|                 |      |          |      |
|-----------------|------|----------|------|
| Negative        | D5F3 | Negative | D4D6 |
| EML4(6)-ALK(20) | ---  | WT       | ---  |
| WT              | ---  | WT       | ---  |
| WT              | ---  | WT       | ---  |
| WT              | ---  | WT       | ---  |
| Negative        | D5F3 | Negative | D4D6 |
| Negative        | D5F3 | Negative | D4D6 |
| unknown-ALK(20) | ---  | WT       | ---  |
| Negative        | D5F3 | Negative | D4D6 |
| Negative        | D5F3 | Negative | D4D6 |
| Negative        | D5F3 | Negative | D4D6 |
| Negative        | D5F3 | Negative | D4D6 |
| Negative        | D5F3 | Negative | D4D6 |
| WT              | ---  | WT       | ---  |
| WT              | ---  | WT       | ---  |
| Negative        | D5F3 | Negative | D4D6 |
| WT              | ---  | WT       | ---  |
| WT              | ---  | WT       | ---  |
| WT              | ---  | WT       | ---  |
| WT              | ---  | WT       | ---  |
| WT              | ---  | WT       | ---  |
| WT              | ---  | WT       | ---  |
| Positive        | D5F3 | Negative | D4D6 |
| Negative        | D5F3 | Negative | D4D6 |
| Negative        | D5F3 | Negative | D4D6 |
| Negative        | D5F3 | Negative | D4D6 |

|          |      |          |      |
|----------|------|----------|------|
| Negative | D5F3 | Negative | D4D6 |
|----------|------|----------|------|
